# Supplementary material for: Ginger Extract-Loaded Sesame Oil-Based Niosomal Emulgel: Quality by Design to Ameliorate Anti-Inflammatory Activity
Source: MDPI journal article supplement (doi:10.3390/gels8110737), 2022-11-14
Supplement: s1 [file s1]

Supplementary material

# Ginger Extract-Loaded Sesame Oil-Based Niosomal Emulgel: Quality by Design to Ameliorate Anti-Inflammatory Activity

Marwa H. Abdallah <sup>1,2,\*</sup>, Hanaa A. Elghamry <sup>2</sup>, Nasrin E. Khalifa <sup>1,3</sup>, Weam M. A. Khojali <sup>4,5</sup>, El-Sayed Khafagy <sup>6,7</sup>, Amr S. Abu Lila <sup>1,2</sup>, Hemat El-Sayed El-Horany <sup>8,9</sup> and Shaimaa El-Housiny <sup>10</sup>

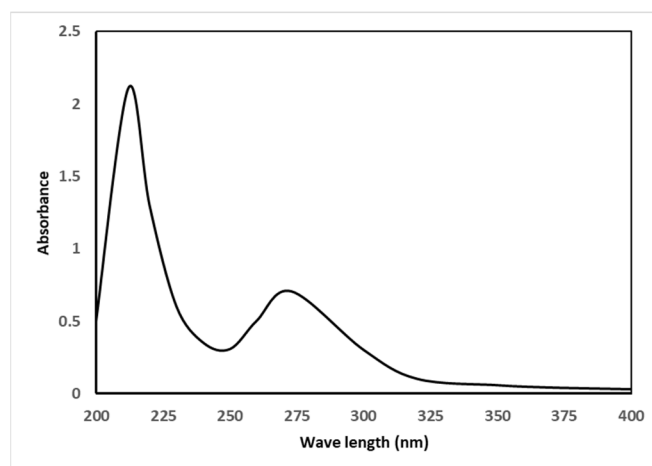

**Figure S1.** A full UV spectrum graph for the ginger extract.
